RESEARCH ARTICLE

# Effect of Cricket Frass Fertilizer on growth and pod production of green beans (*Phaseolus vulgaris* L.)

Clarcky Andrianoroosa Ony <sup>1</sup>, Cédrique L. Solofondranohatra <sup>1</sup>\*,  
Tanjona Ramiadantsoa <sup>1,‡</sup>, Andrianjaka Ravelomanana <sup>1,2</sup>,  
Nivohanintsoa Ramanampomony R. <sup>3</sup>, Sylvain Hugel <sup>1,4,‡</sup>, Brian L. Fisher <sup>1,5,‡</sup>

**1** Madagascar Biodiversity Center, Antananarivo, Madagascar, **2** Mention Entomologie Cultures Elevage et Santé, Faculté des Sciences, Université d'Antananarivo, Antananarivo, Madagascar, **3** Mention Biologie Ecologie Végétales, Faculté des Sciences, Université d'Antananarivo, Antananarivo, Madagascar, **4** Institut des Neurosciences Cellulaires et Intégratives, Centre National de la Recherche Scientifique, Université de Strasbourg, Strasbourg, France, **5** Department of Entomology, California Academy of Sciences, San Francisco, California, United States of America

 These authors contributed equally to this work.  
‡ TR, SH and BLF also contributed equally to this work.  
\* [lovacedrique@gmail.com](mailto:lovacedrique@gmail.com)

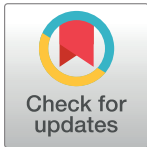

 OPEN ACCESS

**Citation:** Andrianoroosa Ony C, Solofondranohatra CL, Ramiadantsoa T, Ravelomanana A, Ramanampomony R. N, Hugel S, et al. (2024) Effect of Cricket Frass Fertilizer on growth and pod production of green beans (*Phaseolus vulgaris* L.). PLoS ONE 19(5): e0303080. <https://doi.org/10.1371/journal.pone.0303080>

**Editor:** Patrizia Falabella, Università degli Studi della Basilicata, ITALY

**Received:** November 24, 2023

**Accepted:** April 18, 2024

**Published:** May 9, 2024

**Copyright:** © 2024 Andrianoroosa Ony et al. This is an open access article distributed under the terms of the [Creative Commons Attribution License](https://creativecommons.org/licenses/by/4.0/), which permits unrestricted use, distribution, and reproduction in any medium, provided the original author and source are credited.

**Data Availability Statement:** All relevant data are within the manuscript and its [Supporting information](#) files.

**Funding:** CAO and NRR was supported by Partnerships for Enhanced Engagement in Research (PEER-6-125). BLF was partly supported by the Critical Ecosystem Partnership Fund (CEPF) and King Philanthropies.

**Competing interests:** The authors have declared that no competing interests exist.

## Abstract

Cricket Frass Fertilizer (CFF) was tested for its efficiency and potential as a fertilizer on the growth of green beans (*Phaseolus vulgaris* L.) in central Madagascar from April 2020 to October 2020. We grew green beans experimentally for 93 days with seven different fertilizer treatments: NPK 200 kg/ha (0.47 g of N/plant), GUANOMAD (guano from bat) 300 kg/ha (0.26 g of N/plant), CFF 100 kg/ha (0.12 g of N/plant), CFF 200 kg/ha (0.24 g of N/plant), CFF 300 kg/ha (0.38 g of N/plant), CFF 400 kg/ha (0.52 g of N/plant), and no fertilizer (0 g of N/plant). Three plant traits were measured: survival proportion, vegetative biomass, and pod biomass. The survival proportion of plants treated with the highest dose of CFF (400 kg/ha, 88.1%), NPK (79.8%), and GUANOMAD (81.2%) were similar, but plants treated with the former yielded significantly higher vegetative (35.5 g/plant) and pod biomass (11 g/plant). These results suggest that fertilizing green beans with CFF at a 400 kg/ha dose is sufficient for plant survival and growth, and improves pod production. In Madagascar where soil quality is poor, dependence on imported chemical fertilizers (NPK) and other organic fertilizer (GUANOMAD) can be reduced. Cricket Frass Fertilizer can be used as an alternative sustainable fertilizer for beans.

## Introduction

One major current global challenge is to ensure food security to sustain a dramatically growing population while reducing the negative impacts of agriculture on the environment [1, 2]. Low soil fertility is a major constraint to improving agricultural production, making fertilizer use critical [3]. However, excessive use of chemical fertilizer to increase yields causes

unrecoverable environmental footprints [4, 5]. Amongst several issues, chemical fertilizer use reduces biodiversity [6], pollutes marine and terrestrial ecosystems [4, 7], and leads to soil acidification and compaction [5]. Hence, sustainable agricultural production requires the adoption of alternative agricultural practices such as the use of organic fertilizers [8]. The use of organic soil amendments represents an environmentally friendly and economically viable way to increase soil fertility and improve crop yield [9, 10], as well as recycle organic waste products sustainably [11].

The growing practice of farming insects for food and feed [12] offers a new source of organic fertilizer. Insect manure, or frass, is by definition “a mixture of excrements derived from farmed insects, the feeding substrate, parts of farmed insects, dead eggs and with a content of dead farmed insects of not more than 5% in volume and not more than 3% in weight” (Commission Regulation (EU) 2021/192, [13]). Frass has been shown to be an effective organic fertilizer with the capacity to supply nutrients to plants, and the potential to replace conventional fertilizers [14, 15]. Many studies advocate the use of insect frass as a soil amendment that improves soil quality and aids plant growth [12, 16]. These benefits are largely attributed to the nitrogen-rich properties of insect frass [17–20]. Amending soil with insect frass also stimulates soil microbial activity, which reduces plant sensitivity to pathogens, and produces secondary metabolites to protect plants against pathogens [10, 14, 15], all of which enhance plant growth. Therefore, the use of insect frass as fertilizer represents an opportunity to support sustainable crop production [21].

Unlike the frass of mealworms (*Tenebrio molitor* L.) and black soldier flies (*Hermetia illucens* L.), which have been the object of more numerous studies referring to their fertilizing potential, few studies have explored the use of cricket frass to amend soils for crops [22–24]. Butnan et al. (2022) showed that combining cricket frass with *Eucalyptus* biochar improved the yield of Chinese kale (*Brassica oleracea* L.). An experiment comparing the growth of spider plant (*Cleome gynandra* L.) supplemented with cricket frass, cow manure, and synthetic fertilizer showed that frass increased available nitrogen in the soil, and improved vegetative growth [24]. Ferruzca-Campos et al. (2023) demonstrated that substrate amended with less than 1% (w/w) cricket frass, that contains 4.035% of total nitrogen significantly improved the growth and development of tomato plants.

In the highlands of Madagascar, soils are cropped intensively, which has led to a decrease in fertility and soil organic carbon contents [25, 26]. Appropriate fertilizer management strategies are required to improve crop production in the system, yet organic resources are the primary fertilizers accessible to Malagasy farmers [27]. Cricket frass fertilizer (CFF), a new organic fertilizer from local farming of the cricket species *Gryllus madagascarensis* [28], has become available in the country. No study has yet assessed the potential role of CFF on crop growth in Madagascar. Here, we aim to determine the efficiency of CFF as a fertilizer in Madagascar’s agroclimatological conditions. This marks the first study exploring the effect of CFF on plants in Madagascar. We compared the performance of CFF against the chemical fertilizer NPK and the organic fertilizer GUANOMAD (guano derived from bat feces) on the survival, growth, and pod production of green bean plants. Green beans were chosen because, after tomatoes, they are the second-most cultivated vegetable in the commune where the experiment was carried out, occupying about 21% of the vegetable cropping area [29].

## Materials and methods

### Experimental site characteristics

The experiment was conducted in Ampangabe Commune, Ambohidratrimo District, Analamanga Region (18.859° S, 47.403° E) during the dry season (from April to October 2020). The

timing of the planting followed the recommendation of the local horticulture institute (Centre Technique Horticole d'Antananarivo, CTHA). Total average annual rainfall was 1850 mm, with only 15% falling during the dry season [30]. Temperatures ranged from 15°C to 23°C [29]. Soil type was clay (details on soil characteristics are presented in [S1 Appendix](#)).

No permit was required to conduct the study as it was done on a private land where only the owner's approval was needed.

## Fertilizer and crops

This study examined how green bean (*Phaseolus vulgaris* L.), purchased from a local store, responds to fertilizer treatments. We used three fertilizers in the study. The chemical fertilizer NPK 11-22-16 and an organic fertilizer GUANOMAD (N: 4%, P: 13%, K: 2%, GUANOMAD Madagascar company), can both be bought in local stores in Madagascar. Cricket Frass Fertilizer (CFF, Valala Farm Research Lab at MBC, Antananarivo, Madagascar), a mixture of cricket feces and feed residue, is a byproduct of *Gryllus madagascarensis* rearing. The frass was not sifted prior to application. We analyzed the CFF to determine its macro- and micronutrient content ([S2 Appendix](#)).

## Treatments and experimental design

In our experiment, we compared the effect of one control (no fertilizer), one dose of NPK (200 kg/ha; following the Centre Technique Horticole d'Antananarivo recommendation for green beans), one dose of GUANOMAD (300 kg/ha; following the GUANOMAD company recommendation for green beans), and four doses of CFF (CFF 100: 100 kg/ha, CFF 200: 200 kg/ha, CFF 300: 300 kg/ha, and CFF 400: 400 kg/ha). The total nitrogen, phosphorus and potassium equivalent per plant for each treatment are given in [S3 Appendix](#). We used four Fisher blocks of 13.5 m x 4.0 m [31]. Each block had twelve plots (3.0 m x 1.0 m) corresponding to three replicates of control, three replicates of NPK, three replicates of GUANOMAD, and three replicates of one of the CFF doses.

Three weeks before sowing, the soil was plowed (40 cm depth) and crumbled. Fourteen green bean seeds were sown in each plot, and fertilizers were applied at planting by adding the appropriate dose in each 15 cm-deep hole. Plants were watered daily. At 93 days after sowing, two measures of plant survival were considered: survival proportions of all individuals (with or without pod), and survival proportions of individuals that produced pods, related to the number of individuals planted. The latter was considered to quantify the treatment effects on the survival of green bean plants that could produce pods. Vegetative biomass (leaves and stems) and pod biomass were harvested and their fresh weight was measured. Plants with pods weighing  $\leq 2$  g and vegetative biomass  $\leq 3$  g were excluded from the analysis as these were all dry at 93 days.

## Data analysis

We tested data for normality using the Shapiro-Wilk test. We used the Test of Equal or Given Proportions to determine the differences in plant survival rates among all the treatments. Then, we conducted a pairwise proportion test to compare the difference among treatments. Data on plant biomass were analyzed using the Kruskal-Wallis test. Then, Dunn tests were used for pairwise comparisons. All data analyses were performed in the R environment [32] and the level of significance was set at  $p < 0.05$ . All data are in [S4 Appendix](#).

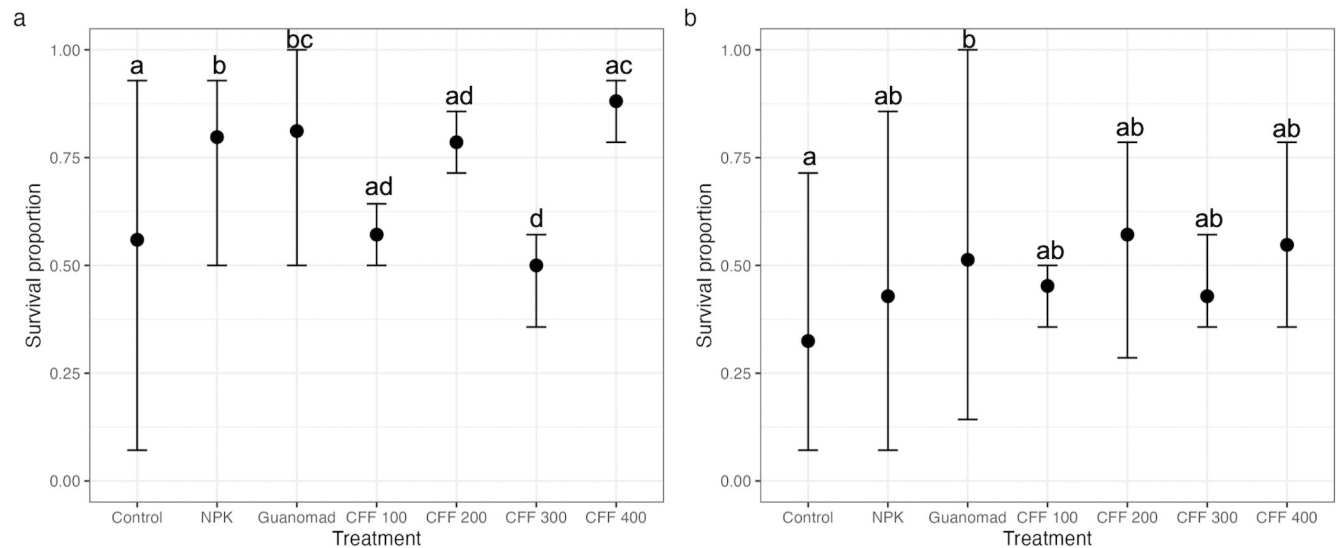

**Fig 1.** Proportion of surviving green bean plants: (a) all plants (b) plants with pod, compared among treatments. Values are averaged ( $n = 168$  for control, NPK and GUANOMAD;  $n = 56$  for each dose of CFF) with error bars representing maximum and minimum values. Letters indicate significance of difference of survival proportion means between treatment; same letters indicate no significant difference and different letters indicate significant differences at  $p = 0.05$ .

<https://doi.org/10.1371/journal.pone.0303080.g001>

## Results

Green bean survival proportions of all plants (with or without pod) and plants that produced pods differed significantly among treatments (Proportion test,  $p < 0.001$ , and  $p = 0.04$  respectively, Fig 1). On average, plants treated with NPK (0.47 g of N/ plant) and GUANOMAD (0.26 g of N/ plant) had significantly higher survival proportions (79.8% and 81.2%, respectively) compared with plants treated with CFF 100 (0.12 g of N/ plant), CFF 200 (0.24 g of N/ plant), CFF 300 (0.38 g of N/ plant), or controls (0 g of N/ plant). Among all plants, the highest survival proportion was associated with the CFF 400 (0.52 g of N/ plant) group (88.1%), which was similar to that of the GUANOMAD group and significantly higher than obtained with NPK (Proportion test,  $p = 0.03$ ). There was no significant difference between the survival proportion of plants having produced pods for all treatments except for the control group, which was significantly lower than obtained with GUANOMAD (Proportion test,  $p = 0.001$ ).

Plants fertilized with NPK, GUANOMAD, and CFF 400 produced significantly higher vegetative biomass (per plant and total, Fig 2a and 2b) than control plants (Kruskal-Wallis test, all  $p < 0.01$  for vegetative biomass per plant;  $p = 0.006$ ,  $p = 0.009$ , and  $p = 0.003$ , respectively for total vegetative biomass). The highest average vegetative biomass weight per plant (Fig 2a) was obtained with CFF 400 (35.5 g), which was significantly higher than all the other treatments (Kruskal-Wallis test,  $p < 0.001$  for all treatments). The highest total vegetative biomass (Fig 2b) was also obtained with CFF 400 (438 g, with a minimum weight of 298 g and a maximum weight of 684 g), which was similar to the NPK and GUANOMAD groups (Kruskal-Wallis test,  $p = 0.13$ , and  $p = 0.12$ , respectively). There was no significant difference between the pod biomass per plant obtained from control, NPK, GUANOMAD, CFF 200 and CFF 300 (Fig 2c). Plants fertilized with CFF 400 produced the highest pod biomass per plant (median = 11 g), which was significantly higher than all the other treatments but the control. Treatments did not have any significant effect on the total pod biomass of green bean plants (Kruskal-Wallis

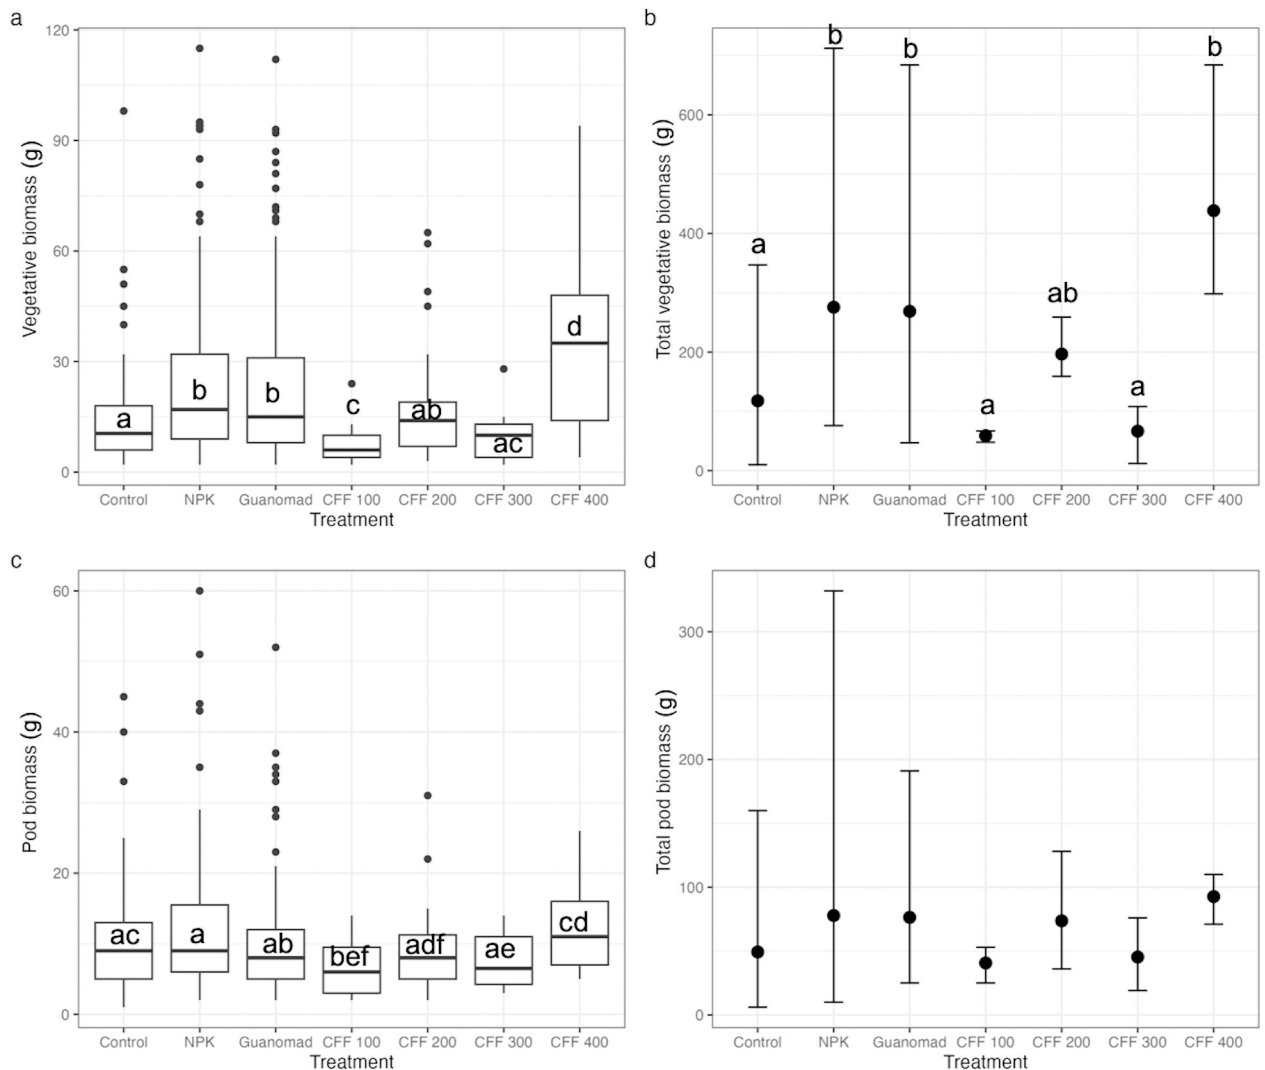

**Fig 2.** Vegetative biomass of green bean plants (a) per individuals, (b) total per plot; pod biomass (c) per individuals, (d) total per plot, compared among treatments. Values for total vegetative and pod biomass are averaged ( $n = 168$  for control, NPK and GUANOMAD;  $n = 56$  for each dose of CFF) with error bars representing maximum and minimum values. Letters indicate significance of difference of trait means between treatments, with same letters indicating no significant difference and different letters indicating significant differences at  $p = 0.05$ .

<https://doi.org/10.1371/journal.pone.0303080.g002>

test,  $p = 0.41$ ) but plants fertilized with CFF 400 produced the highest mean value (92.7 g) and the highest minimum value (71 g).

Treatments significantly affected green bean pod to vegetative biomass ratio (Kruskal-Wallis test,  $p = 0.004$ ). The two highest ratios were obtained from CFF 100 and CFF 300 (Fig 3, median = 1.25 and 1.18, respectively) and were significantly higher than the ratio obtained from NPK and GUANOMAD. The lowest average ratio was associated with CFF 400 (0.67).

## Discussion

We conducted an experiment to quantify the effects of CFF, a new organic fertilizer produced by cricket rearing, on green bean crop survival, growth, and yield. We tested four doses of CFF and compared them with the recommended dose of NPK and GUANOMAD for green bean

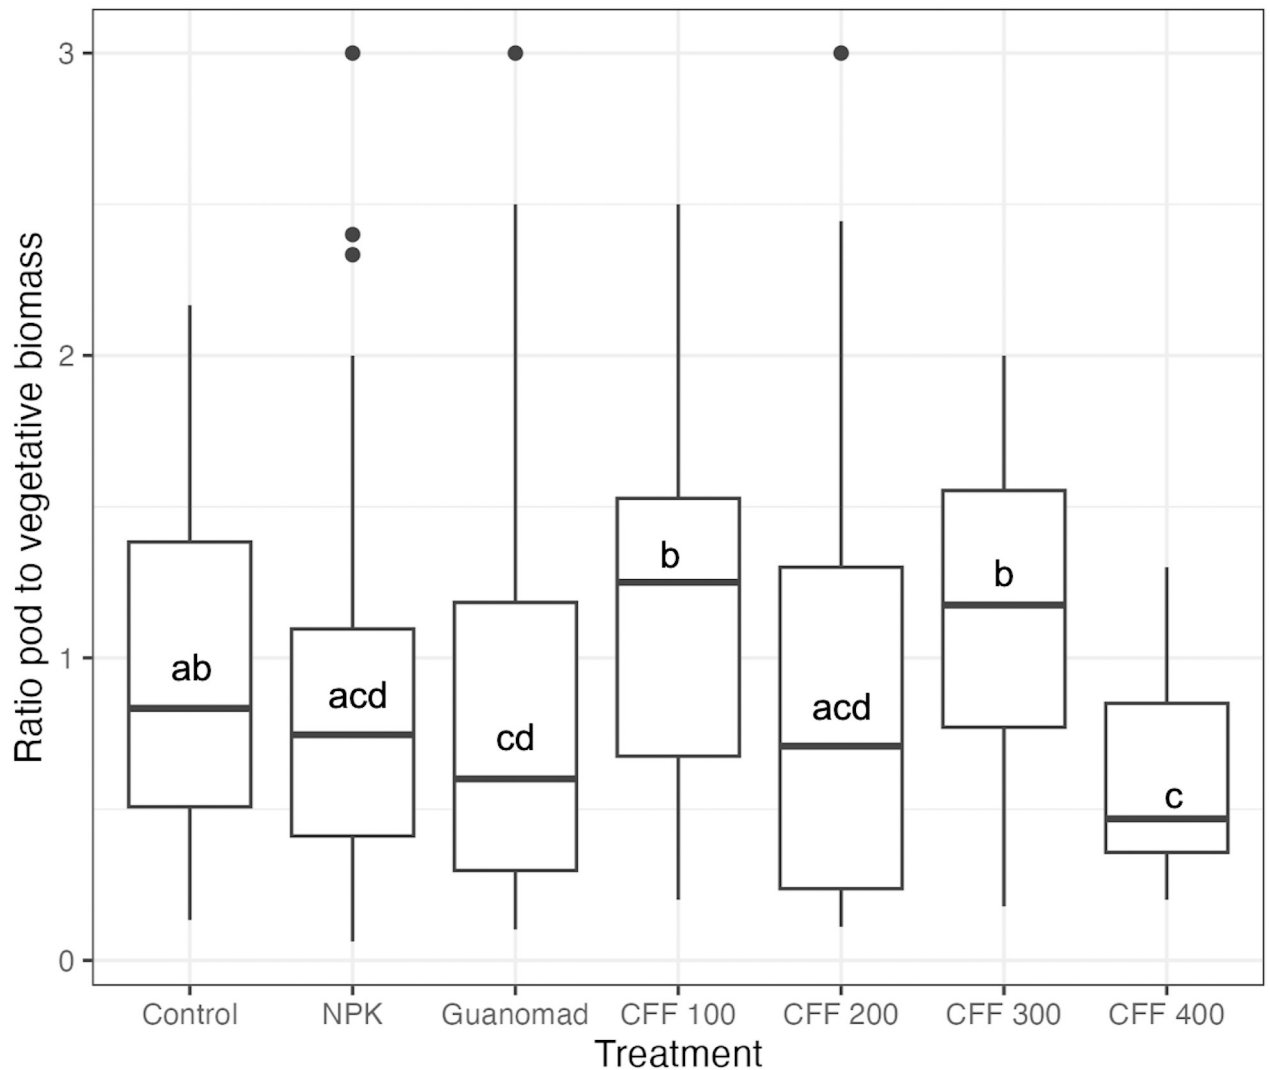

**Fig 3. Ratio of pod to vegetative biomass of green beans plants compared among treatments.** Letters indicate significance of difference of the ratio means between treatments, with same letters indicating no significant difference and different letters indicating significant differences at  $p = 0.05$ .

<https://doi.org/10.1371/journal.pone.0303080.g003>

crops. Demonstrating the potential of CFF to improve green bean production will encourage the integration of this fertilizer into farming practices.

Plant nutrient acquisition is influenced by morphological and physiological characteristics that adjust in response to environmental factors such as climate, soil, and fertilizer application [e.g. 33, 34]. Among the four doses of CFF tested, the highest dose (400 kg/ha) had the most comparable effect to NPK and GUANOMAD on green bean plants. At a dose of 400 kg/ha of CFF, each green bean plant received a total nitrogen of 0.52 g, which is similar to NPK's and the double of GUANOMAD's (S3 Appendix). Vegetative and pod biomass production per plant increased with the addition of CFF at 400 kg/ha, which supported previous findings that using insect frass fertilizer improved nutrient levels in soil [e.g. 19, 350, 36]. Organic nitrogen is relatively abundant in most frass ranging between 1.6–7% [37]. This element is essential for plant growth and development, specifically for biomass production [5, 38]. Our results are in

line with previous findings demonstrating that the contribution of nitrogen from frass supplied to the soil boosts the growth of plants such as dragon fruit cacti (*Selenicereus undatus* D. R. Hunt) and chards (*Beta vulgaris* L.) [13, 39]. Although the amount of nitrogen provided by GUANOMAD was smaller than that provided by CFF (400 kg/ha) and NPK, it still promoted green beans growth, possibly because it contains microbacterial flora that facilitates nutrient absorption [40]. The amount of nitrogen provided by the other doses of CFF (100 kg/ha, 200 kg/ha, and 300 kg/ha) might not have been sufficient for our plants to grow as much vegetative biomass as those treated with NPK and GUANOMAD (Fig 2a and 2b) but just enough to allocate more biomass to vegetative tissues than pods (Fig 3). It is important to note that green beans, like other legumes species has symbiotic association with bacteria that can fix atmospheric nitrogen [41], and that frass also contains nitrifying bacteria that make nitrogen within the soil accessible to plants [37]. These might have improved green beans nitrogen access and contributed to its vegetative biomass production for plants treated with CFF (Fig 2a and 2b). Frass phytotoxicity is often associated with the addition of high frass concentration [37], which we did not observe at the highest dose of CFF. This suggests that at a dose of 400 kg/ha, CFF does not cause deleterious impact on green bean plant growth and biomass production.

A significantly higher proportion of green bean plants treated with CFF at 400 kg/ha survived than plants grown with NPK, but this figure was similar to that of GUANOMAD (Fig 1a). Organic fertilizers keep plants healthy and suppress some diseases, while chemical fertilizers can increase the sensitivity of plants to diseases and pests [42, 43]. Additionally, insect frass contains chitin, which improves soil quality and plant health by stimulating plant defenses against pathogens [20, 44, 45]. Plants treated with CFF 400 had a higher chance of survival, as insect frass might have increased the abundance of soil microorganisms and might have stimulated their biocontrol activity, which made the crops resistant to pests and diseases [46, 47].

The positive effects of fertilizers on plant growth are attributed primarily to increased nutrient levels in the soil. These effects are generally well understood for fertilizers such as NPK and compost [48–52]. Here, we showed that cricket frass is more effective than NPK and GUANOMAD in promoting the vegetative and pod biomass per plant of green bean plants at an application rate of 400 kg/ha (Fig 2a and 2c), indicating that nutrients for growth in frass are effective in crops. Frass is characterized with high levels of organic carbon [18, 53, 54]. It has been shown that frass decomposes and mineralizes rapidly after its incorporation into the soil [15, 55–57], mainly because of its high carbon content [53]. This might have made nutrients readily available to the green beans during their early growth stages. Phosphorus is one of the most essential nutrients for fruit development [e.g., 5, 58], and is required at an adequate level in the early stages of plant growth [59]. Potassium is another important nutrient that influences plant growth and development [60]. Studies have shown that it protects plants against biotic and abiotic stresses and contributes to their survival [e.g. 61, 62]. Though the amount of phosphorus and potassium supplied by CFF was relatively small compared to NPK (S3 Appendix), it might have been sufficient for the green bean plants to optimize their fruit production and stress tolerance at a dose of 400 kg/ha. Similar results have been found by other authors who demonstrated that applying even relatively low rates of organic amendments increased crop yields by significantly improving soil conditions [35, 63, 64].

This study presents the first example of how cricket frass affects plants in Madagascar. Compared to the frass of other insects, CFF is still poorly studied, and most of our conclusions refer to experiments using the frass of other insects on crops. However, different insect species rely on different feeds and substrates to grow. These factors in turn can significantly affect frass quality [18] and may thus affect plant growth in different ways. This work highlights the need to test the effects of cricket frass on the growth of other crops to determine how well

cricket frass supplies nutrients to plants, and what strategies plants use to acquire these nutrients.

## Conclusions

Optimizing crop development is an integral part of effective farming management practices. These practices should be tailored to the nutrient requirements of target crop plants. Here, we demonstrated that cricket frass fertilizer from cricket rearing has potential for use as an organic fertilizer to promote green bean plant growth and survival. If supplied at an adequate rate, cricket frass can be a sustainable fertilizer capable of improving crop yields. Its development and promotion holds promise to enhance the livelihoods of smallhold farmers in places like Madagascar where food security is precarious.

## Supporting information

### **S1 Appendix. Site's soil characteristics.**

(DOCX)

### **S2 Appendix. CFF nutrient content.** (C: Carbon; Available P: available phosphorous; Soluble P: soluble phosphorus; N tot: total nitrogen; Ca: Calcium; Mg: Magnesium; S: sulfur).

(DOCX)

### **S3 Appendix. Total nitrogen (N), phosphorus (P), and potassium (K) equivalent per plant for each fertilizer treatment.**

(DOCX)

### **S4 Appendix. Data underlying the results presented in the study.**

(CSV)

## Acknowledgments

We thank Léa Becker (CNRS Strasbourg) for giving statistical advice and helping with data analysis.

## Author Contributions

**Conceptualization:** Andrianjaka Ravelomanana, Nivohanintsoa Ramanampamonjy R.

**Data curation:** Clarcky Andrianoroso Ony, Cédrique L. Solofondranohatra, Tanjona Ramiadantsoa.

**Formal analysis:** Clarcky Andrianoroso Ony, Cédrique L. Solofondranohatra, Tanjona Ramiadantsoa.

**Funding acquisition:** Andrianjaka Ravelomanana, Sylvain Hugel, Brian L. Fisher.

**Investigation:** Clarcky Andrianoroso Ony.

**Methodology:** Clarcky Andrianoroso Ony, Nivohanintsoa Ramanampamonjy R.

**Project administration:** Andrianjaka Ravelomanana, Nivohanintsoa Ramanampamonjy R., Brian L. Fisher.

**Supervision:** Tanjona Ramiadantsoa, Andrianjaka Ravelomanana, Nivohanintsoa Ramanampamonjy R., Sylvain Hugel, Brian L. Fisher.



**Validation:** Tanjona Ramiadantsoa, Andrianjaka Ravelomanana, Nivohanintsoa Ramanampamonjy R., Sylvain Hugel, Brian L. Fisher.

**Visualization:** Clarcky Andrianorosa Ony, Cédrique L. Solofondranohatra, Tanjona Ramiadantsoa.

**Writing – original draft:** Clarcky Andrianorosa Ony, Cédrique L. Solofondranohatra.

**Writing – review & editing:** Clarcky Andrianorosa Ony, Cédrique L. Solofondranohatra, Nivohanintsoa Ramanampamonjy R., Sylvain Hugel, Brian L. Fisher.

## References

1. European Commission. Farm to fork strategy: for a fair, healthy and environmentally-friendly food system. Communication from the Commission to the European Parliament, the Council, the European Economic and Social Committee and the Committee of the Regions. 2020; 381: 1–9.
2. Zsögön A, Peres LE, Xiao Y, Yan J, Fernie AR. Enhancing crop diversity for food security in the face of climate uncertainty. *Plant J.* 2022; 109: 402–414. <https://doi.org/10.1111/tpj.15626> PMID: 34882870
3. Ayoub AT. Fertilizers and the environment. *Nutr. Cycling Agroecosyst.* 1999; 55: 117–121. <https://doi.org/10.1023/A:1009808118692>
4. Sharma N, Singhvi R. Effects of chemical fertilizers and pesticides on human health and environment: A review. *Int. J. Environ. Agric. Biotech.* 2017; 10: 675–8.
5. Kumar R, Kumar R, Prakash O. Chapter 5: The impact of chemical fertilizers on our environment and ecosystem. Chief Ed. 2019; 35: 19.
6. Nelson DW. Effect of nitrogen excess on quality of food and fiber. In: Hauck RD, editors. *Nitrogen in Crop Production*. 1984. pp. 643–661. <https://doi.org/10.2134/1990.nitrogenincroproduction.c44>
7. Whitmee S, Haines A, Beyrer C, Boltz F, Capon AG, de Souza Dias BF et al. Safeguarding human health in the anthropocene epoch: Report of The Rockefeller Foundation-Lancet Commission on Planetary Health. *The Lancet.* 2015; 386: 1973–2028. [https://doi.org/10.1016/S0140-6736\(15\)60901-1](https://doi.org/10.1016/S0140-6736(15)60901-1) PMID: 26188744
8. Timsina J. Can organic sources of nutrients increase crop yields to meet global food demand? *Agronomy.* 2018; 8: 214. <https://doi.org/10.3390/agronomy8100214>
9. Bonanomi G, De Filippis F, Zotti M, Idbella M, Cesarano G, Al-Rowaily S et al. Repeated applications of organic amendments promote beneficial microbiota, improve soil fertility and increase crop yield. *Appl. Soil Ecol.* 2020; 156: 103714. <https://doi.org/10.1016/j.apsoil.2020.103714>
10. Poveda J. Insect frass in the development of sustainable agriculture. A review. *Agron. Sustain. Dev.* 2021; 41: 5. <https://doi.org/10.1007/s13593-020-00656-x>
11. Sharma B, Vaish B, Monika, Singh UK, Singh P, Singh RP. Recycling of organic wastes in agriculture: an environmental perspective. *Int. J. Environ. Re.* 2019; 13: 409–429. <https://doi.org/10.1007/s41742-019-00175-y>
12. Van Huis A, Van Itterbeek J, Klunder H, Mertens E, Halloran A, Muir G, et al. Edible insects: future prospects for food and feed security (No. 171). Food and Agriculture Organization of the United Nations; 2013.
13. International Platform of Insects for Food and Feed. 2022. <https://ipiff.org/insects-frass/>
14. Poveda J, Jiménez-Gómez A, Saati-Santamaría Z, Usategui-Martín R, Rivas R, García-Fraile P. Mealworm frass as a potential biofertilizer and abiotic stress tolerance-inductor in plants. *Appl. Soil Ecol.* 2019; 142: 110–122. <https://doi.org/10.1016/j.apsoil.2019.04.016>
15. Houben D, Daoulas G, Faucon MP, Dulaurent AM. Potential use of mealworm frass as a fertilizer: Impact on crop growth and soil properties. *Sci. Rep.* 2020; 10: 4659. <https://doi.org/10.1038/s41598-020-61765-x> PMID: 32170150
16. Čičková H, Newton GL, Lacy RC, Kozánek M. The use of fly larvae for organic waste treatment. *Waste Management.* 2015; 35: 68–80. <https://doi.org/10.1016/j.wasman.2014.09.026> PMID: 25453313
17. Kagata H, Ohgushi T. Ingestion and excretion of nitrogen by larvae of a cabbage armyworm: The effects of fertilizer application. *Agric. For. Entomol.* 2011; 13: 143–148. <https://doi.org/10.1111/j.1461-9563.2010.00502.x>
18. Kagata H, Ohgushi T. Positive and negative impacts of insect frass quality on soil nitrogen availability and plant growth. *Popul. Ecol.* 2012; 54: 75–82. <https://doi.org/10.1007/s10144-011-0281-6>

19. Beesigamukama D, Mochoge B, Korir NK, Fiaboe KK, Nakimbugwe D, Khamis F et al. Exploring black soldier fly frass as novel fertilizer for improved growth, yield, and nitrogen use efficiency of maize under field conditions. *Front. Plant Sci.* 2020; 11: 574592. <https://doi.org/10.3389/fpls.2020.574592> PMID: 33072150
20. Tanga CM, Beesigamukama D, Kassie M, Egonyu PJ, Ghemoh CJ, Nkoba K et al. Performance of black soldier fly frass fertiliser on maize (*Zea mays* L.) growth, yield, nutritional quality, and economic returns. *J. Insects Food Feed.* 2022; 8: 185–196. <https://doi.org/10.3920/JIFF2021.0012>
21. Barragán-Fonseca KY, Nurfikari A, Van De Zande EM, Wantulla M, Van Loon JJ, De Boer W et al. Insect frass and exuviae to promote plant growth and health. *Trends Plant Sci.* 2022; 7: 646–654. <https://doi.org/10.1016/j.tplants.2022.01.007> PMID: 35248491
22. Butnan S, Duangpukdee J, Sriraj P. Temporal effects of the combined use of cricket frass and eucalyptus biochar on the yield and tissue nitrate content in Chinese kale. *Pertanika J. Trop. Agric. Sci.* 2022; 45: 697–710. <https://doi.org/10.47836/pjtas.45.3.10>
23. Ferruzca-Campos EA, Rico-Chavez AK, Guevara-González RG, Urrestarazu M, Cunha-Chiamolera TPL, Reynoso-Camacho R et al. Biostimulant and elicitor responses to cricket frass (*Acheta domestica*) in tomato (*Solanum lycopersicum* L.) under protected conditions. *Plants.* 2023; 12: 1327. <https://doi.org/10.3390/plants12061327> PMID: 36987015
24. Wanjugu A, Bulli P, Andika D. Effects of cricket frass on vegetative growth of *Cleome gynandra*. *Afr. J. Agric. Res.* 2023; 19: 210–215. <https://doi.org/10.5897/AJAR2022.16060>
25. Minten B, Ralison E. Economic Analysis. Part II: Summary of analytical findings. Final report. FOFIFA, INSTAT, Cornell University; 2003: pp 27.
26. Ramanankasina E, Rabeharisoa L. La terre, un héritage à bien gérer. *Mém. Acad. Nat. Art Lett. Sc.* 2003; 49: 43–50.
27. Andriamananjara A, Rakotoson T, Razanakoto OR, Razafimanantsoa MP, Rabeharisoa L, Smolders E. Farmyard manure application in weathered upland soils of Madagascar sharply increase phosphate fertilizer use efficiency for upland rice. *Field Crops Res.* 2018; 222: 94–100. <https://doi.org/10.1016/j.fcr.2018.03.022>
28. Walker F. Catalogue of the Specimens of Dermaptera Saltatoria and Supplement of the Blattariæ in the Collection of the British Museum. Trustees of the British Museum; 1869.
29. Commune Ampangabe. Monographie Communale Ampangabe; 2008.
30. Cornet A. Essai de Cartographie Bioclimatique à Madagascar: Note explicative 55. Paris: ORSTOM; 1974.
31. Fisher RA. *The Design of Experiments*. 9th ed. New York: Macmillan; 1971.
32. R Core Team. R: A language and environment for statistical computing. 2022.
33. Fageria NK, Baligar VC. Enhancing nitrogen use efficiency in crop plants. *Adv. Agron.* 2005; 88: 97–185.
34. Marschner H. *Marschner's mineral nutrition of higher plants*. UK: Academic Press; 2011.
35. Zahn NH. The effects of insect frass created by *Hermetia illucens* on spring onion growth and soil fertility. M.Sc. Thesis, University of Stirling. 2017.
36. Quilliam RS, Nuku-Adeku C, Maquart P, Little D, Newton R, Murray F. Integrating insect frass biofertilizers into sustainable peri-urban agro-food systems. *J. Insects Food Feed.* 2020; 6: 315–322. <https://doi.org/10.3920/JIFF2019.0049>
37. Hénault-Ethier L, Quinche M, Reid B, Hotte N, Fortin A, Normandin É et al. Opportunities and challenges in upcycling agri-food byproducts to generate insect manure (frass): A literature review. *Waste Manag.* 2024; 176: 169–191. <https://doi.org/10.1016/j.wasman.2023.12.033> PMID: 38301601
38. Kulcheski FR, Côrrea R, Gomes IA, de Lima JC, Margis R. NPK macronutrients and microRNA homeostasis. *Front. Plant Sci.* 2015; 6: 451. <https://doi.org/10.3389/fpls.2015.00451> PMID: 26136763
39. Koh DWS, Ang BYX, Yeo JY, Xing Z, Gan SKE. Plastic agriculture using worms: Augmenting polystyrene consumption and using frass for plant growth towards a zero-waste circular economy. *UCL Open: Environment Preprint.* 2020. <https://doi.org/10.14324/111.444/000048.v2>
40. Shetty S, Sreepada KS, Bhat R. Effect of bat guano on the growth of *Vigna radiata* L. *Int. J. Sci. Res. Pub.* 2013; 3: 1–8.
41. Adams MA, Turnbull TL, Sprent JI, Buchmann N. Legume are different: leaf nitrogen, photosynthesis, and water use efficiency. *Proc. Natl. Acad. Sci. U.S.A.* 2016; 113: 4098–4103. <https://doi.org/10.1073/pnas.1523936113> PMID: 27035971
42. Chen JH. The combined use of chemical and organic fertilizers and/or biofertilizer for crop growth and soil fertility. In: International workshop on sustained management of the soil-rhizosphere system for efficient crop production and fertilizer use. Thailand: Land Development Department; 2006. pp. 1–11.

43. Choi S, Hassanzadeh N. BSFL Frass: A novel biofertilizer for improving plant health while minimizing environmental impact. *Candian Sci. fair J.* 2019; 2: 41–46. <https://doi.org/10.18192/csfj.v2i220194146>
44. Ramírez MA, Rodríguez AT, Alfonso L, Peniche C. Chitin and its derivatives as biopolymers with potential agricultural applications. *Biotechnol. Apl.* 2010; 27: 270–276.
45. Sharp RG. A review of the applications of chitin and its derivatives in agriculture to modify plant-microbial interactions and improve crop yields. *Agronomy.* 2013; 3: 757–793. <https://doi.org/10.3390/agronomy3040757>
46. Pineda A, Zheng SJ, van Loon JJ, Pieterse CM, Dicke M. Helping plants to deal with insects: the role of beneficial soil-borne microbes. *Trends Plant Sci.* 2010; 15: 507–514. <https://doi.org/10.1016/j.tplants.2010.05.007> PMID: 20542720
47. Pieterse CM, Zamioudis C, Berendsen RL, Weller DM, Van Wees SC, Bakker PA. Induced systemic resistance by beneficial microbes. *Annu. Rev. Phytopathol.* 2014; 52: 347–375. <https://doi.org/10.1146/annurev-phyto-082712-102340> PMID: 24906124
48. Maynard AA, Hill DE. Cumulative effect of leaf compost on yield and size distribution in onions. *Compost Sci. Util.* 2000; 8: 12–18. <https://doi.org/10.1080/1065657X.2000.10701744>
49. Chaoui H., Zibilske LM, Ohno T. Effects of earthworm casts and compost on soil microbial activity and plant nutrient availability. *Soil Biol. Biochem.* 2003; 35: 295–302. [https://doi.org/10.1016/S0038-0717\(02\)00279-1](https://doi.org/10.1016/S0038-0717(02)00279-1)
50. Raviv M, Oka Y, Katan J, Hadar Y, Yogev A, Medina Set al. High-nitrogen compost as a medium for organic container-grown crops. *Bioresour. Technol.* 2005; 96: 419–427. <https://doi.org/10.1016/j.biortech.2004.06.001> PMID: 15491822
51. Grigatti M, Giorgioni ME, Ciavatta C. Compost-based growing media: Influence on growth and nutrient use of bedding plants. *Bioresour. Technol.* 2007; 98: 3526–3534. <https://doi.org/10.1016/j.biortech.2006.11.016> PMID: 17204421
52. Seran TH, Srikrishnah S, Ahamed MMZ. Effect of different levels of inorganic fertilizers and compost as basal application on the growth and yield of onion (*Allium cepa* L.). *J. Agric. Sci.* 2010; 5: 64–70.
53. Lovett GM, Ruesink A. Carbon and nitrogen mineralization from decomposing gypsy moth frass. *Oecologia.* 1995; 104: 133–138. <https://doi.org/10.1007/BF00328577> PMID: 28307349
54. Frost CJ, Hunter MD. Insect canopy herbivory and frass deposition affect soil nutrient dynamics and export in oak mesocosms. *Ecology.* 2004; 85: 3335–3347.
55. Madritch MD, Donaldson JR, Lindroth RL. Canopy herbivory can mediate the influence of plant genotype on soil processes through frass deposition. *Soil Biol. Biochem.* 2007; 39: 1192–1201. <https://doi.org/10.1016/j.soilbio.2006.12.027>
56. Dulaurent AM, Daoulas G, Faucon MP, Houben D. Earthworms (*Lumbricus terrestris* L.) mediate the fertilizing effect of frass. *Agronomy.* 2020; 10: 783. <https://doi.org/10.3390/agronomy10060783>
57. Houben D, Daoulas G, Dulaurent AM. Assessment of the short-term fertilizer potential of mealworm frass using a pot experiment. *Front. Sustain. Food.* 2021; 5: 714596.
58. Sanchez PA, Uehara G. Management considerations for acid soils with high phosphorus fixation capacity. In: Khasawneh FE, Sample EC, Kamprath EJ, editors. *The Role of Phosphorus in Agriculture.* Madison: ASA, CSSA, and SSSA Books; 1980. pp. 471–514. <https://doi.org/10.2134/1980.roleofphosphorus.c18>
59. Grant C, Bittman S, Montreal M, Plenchette C, Morel C. Soil and fertilizer phosphorus: Effects on plant P supply and mycorrhizal development. *Can. J. Plant Sci.* 2005; 85: 3–14. <https://doi.org/10.4141/P03-182>
60. Wang M, Zheng Q, Shen Q, Guo S. The critical role of potassium in plant stress response. *Int. J. Mol. Sci.* 2013; 14: 7370–7390. <https://doi.org/10.3390/ijms14047370> PMID: 23549270
61. Sarwar M. Effects of potassium fertilization on population build up of rice stem borers (lepidopteron pests) and rice (*Oryza sativa* L.) yield. *J. Cereals Oilseeds.* 2012; 3: 6–9
62. Egilla JN, Davies FT, Boutton TW. Drought stress influences leaf water content, photosynthesis, and water-use efficiency of hibiscus rosa-sinensis at three potassium concentrations. *Photosynthetica.* 2005; 43: 135–140.
63. Ouédraogo E. Use of compost to improve soil properties and crop productivity under low input agricultural system in West Africa. *Agric. Ecosyst. Environ.* 2001; 84: 259–266. [https://doi.org/10.1016/S0167-8809\(00\)00246-2](https://doi.org/10.1016/S0167-8809(00)00246-2)
64. Ouédraogo E, Mando A, Brussaard L, Stroosnijder L. Tillage and fertility management effects on soil organic matter and sorghum yield in semiarid West Africa. *Soil Tillage Res.* 2007; 94: 64–74. <https://doi.org/10.1016/j.still.2006.07.001>
